# Supplementary material for: High-dose chemotherapy and autologous stem cell transplant compared with conventional chemotherapy for consolidation in newly diagnosed primary CNS lymphoma—a randomized phase III trial (MATRix)
Source: Springer Nature journal article supplement (doi:10.1186/s12885-016-2311-4), 2016-04-21
Supplement: MOESM1 [file 10043552]

## Participating centers and ethics committees

|   | Leading center                                                                                                                                                                      | Principal Trial Coordinator                                                      | Leading ethics committee                                                                                                                                    |
|---|-------------------------------------------------------------------------------------------------------------------------------------------------------------------------------------|----------------------------------------------------------------------------------|-------------------------------------------------------------------------------------------------------------------------------------------------------------|
| 1 | Klinikum Stuttgart<br>Klinik für Hämatologie,<br>Onkologie und Palliativmedizin<br>Stuttgart Cancer Center /<br>Tumorzentrum Eva Mayr-Stihl<br>Kriegsbergstr. 60<br>70174 Stuttgart | LKP:<br>Prof. Dr. Gerald Illerhaus<br>Stellvertreterin:<br>Dr. Kristina Mikesch  | Ethik-Kommission bei der<br>Landesärztekammer Baden-<br>Württemberg<br>Jahnstraße 40<br>70597 Stuttgart                                                     |
|   | Participating centers                                                                                                                                                               | PI & Deputy PI:                                                                  | Local ethics committees:                                                                                                                                    |
| 2 | Universitätsklinikum Aachen<br>Klinik für Onkologie, Hämatologie<br>und Stammzelltransplantation<br>(Medizinische Klinik IV)<br>Pauwelsstr. 30<br>52074 Aachen                      | Prüfer:<br>Dr. med. Jens Panse<br>Stellvertreterin:<br>Dr. med. Mareike Tometten | Ethik-Kommission an der<br>Medizinischen Fakultät<br>der RWTH Aachen<br>Pauwelsstraße 30<br>52074 Aachen                                                    |
| 3 | Klinikum Augsburg<br>II. Medizinische Klinik<br>Cancer Center Augsburg<br>Stenglinstr.2<br>86156 Augsburg                                                                           | Prüfer:<br>Prof. Dr. Martin Trepel<br>Stellvertreter:<br>PD Dr. Andreas Rank     | Ethik-Kommission der Bayerischen<br>Landesärztekammer<br>Mühlbauerstraße 16<br>81677 München                                                                |
| 4 | Städtisches Klinikum<br>Braunschweig gGmbH<br>Medizinische Klinik III<br>Hämatologie und Onkologie<br>Celler Straße 38<br>38114 Braunschweig                                        | Prüfer:<br>Dr. Sebastian Schroll<br>Stellvertreter:<br>Dr. Heiko Hütten          | Ethik-Kommission bei der<br>Ärztekammer Niedersachsen<br>Berliner Allee 20<br>30175 Hannover                                                                |
| 5 | Klinikum Bremen-Mitte gGmbH<br>Medizinische Klinik I<br>St.Jürgen.Str. 1<br>28177 Bremen                                                                                            | Prüfer:<br>Prof. Dr. Bernd Hertenstein<br>Stellvertreter:<br>Dr. Stefan Kaun     | Ethik-Kommission des Landes Bremen<br>Institut für klinische Pharmakologie<br>Klinikum Bremen-Mitte gGmbH<br>St.-Jürgen-Straße 1<br>28177 Bremen            |
| 6 | Klinikum Chemnitz gGmbH<br>Klinik für Innere Medizin III<br>Bürgerstraße 2<br>09113 Chemnitz                                                                                        | Prüfer:<br>PD Dr. Mathias Hänel<br>Stellvertreterin:<br>Dr. Anke Morgner         | Ethik-Kommission der sächsischen<br>Landesärztekammer<br>Schützenhöhe 16<br>01099 Dresden                                                                   |
| 7 | Universitätsklinikum Düsseldorf<br>Klinik für Hämatologie, Onkologie<br>und Klinische Immunologie<br>Moorenstr. 5<br>40225 Düsseldorf                                               | Prüfer:<br>Prof. Dr. Guido Kobbe<br>Stellvertreter:<br>Dr. Mustafa Kondakci      | Ethik-Kommission der Medizinischen<br>Fakultät der Heinrich-Heine-Universität<br>Düsseldorf<br>Kinderklinik, Geb. 13.41<br>Moorenstr. 5<br>40225 Düsseldorf |
| 8 | Universitätsklinikum Erlangen<br>Medizinische Klinik 5<br>Hämatologie und Internistische<br>Onkologie<br>Ulmenweg 18<br>91054 Erlangen                                              | Prüfer:<br>Prof. Dr. Stephan Krause<br>Stellvertreter:<br>Dr. Bernd Spriewald    | Ethik-Kommission der Medizinischen<br>Fakultät<br>Friedrich-Alexander-Universität<br>Erlangen-Nürnberg<br>Krankenhausstraße 12<br>91054 Erlangen            |
| 9 | Universitätsklinikum Essen<br>Klinik für Hämatologie<br>Hufelandstraße 55<br>45122 Essen                                                                                            | Prüfer:<br>PD Dr. Alexander Röth<br>Stellvertreter:<br>PD Dr. Andreas Hüttmann   | Ethik-Kommission der Med. Fakultät<br>der Universität Duisburg-Essen<br>Jakobs Universitätsklinikum Essen<br>Robert-Koch-Str. 9-11<br>45122 Essen           |

## Participating centers und ethics committees

|    |                                                                                                                                                                                  |                                                                                                                                  |                                                                                                                                                      |
|----|----------------------------------------------------------------------------------------------------------------------------------------------------------------------------------|----------------------------------------------------------------------------------------------------------------------------------|------------------------------------------------------------------------------------------------------------------------------------------------------|
| 10 | Klinikum der Johann-Wolfgang-Goethe-Universität<br>Medizinische Klinik II<br>Hämatologie und Onkologie<br>Theodor-Stern-Kai 7<br>60590 Frankfurt/Main                            | Prüfer:<br>Dr. Johannes Atta<br>Stellvertreterin:<br>Dr. Uta Brunnberg                                                           | Ethik-Kommission des Fachbereichs<br>Medizin<br>der Johann Wolfgang Goethe-Universität Frankfurt<br>Theodor-Stern-Kai 7<br>60590 Frankfurt am Main   |
| 11 | Universitätsklinikum Freiburg<br>Medizinische Klinik I<br>Hugstetter Str. 55<br>79106 Freiburg                                                                                   | Prüfer:<br>Prof. Dr. Jürgen Finke<br>Stellvertreterin:<br>Dr. Elisabeth Schorb                                                   | Ethik-Kommission<br>der Albert-Ludwigs-Universität Freiburg<br>Engelberger Straße 21<br>79106 Freiburg                                               |
| 12 | Universitätsklinikum Göttingen<br>Abteilung Hämatologie/Onkologie,<br>Neurochirurgie<br>Robert-Koch-Str. 40<br>37075 Göttingen                                                   | Prüfer:<br>Dr. med. Justin Hasenkamp<br>Stellvertreterin:<br>Dr. med. Friederike Braulke                                         | Ethik-Kommission der Medizinischen<br>Fakultät der<br>Georg-August-Universität<br>Von-Siebold-Straße 3<br>37075 Göttingen                            |
| 13 | Universitätsmedizin Greifswald<br>Klinik und Poliklinik für Innere<br>Medizin C<br>Hämatologie, Onkologie und<br>Transplantationszentrum<br>Sauerbruchstraße<br>17475 Greifswald | Prüfer:<br>Prof. Dr. Christian Andreas<br>Schmidt<br>Stellvertreter:<br>Dr. Carsten Hirt                                         | Ethikkommission an der<br>Universitätsmedizin Greifswald<br>Institut für Pharmakologie<br>Felix-Hausdorff-Str.3<br>17487 Greifswald                  |
| 14 | Universitätsklinikum Halle (Saale)<br>Klinik für Innere Medizin IV<br>Hämatologie/ Onkologie<br>Ernst-Grube-Straße 40<br>06120 Halle                                             | Prüferin:<br>PD Dr. Katrin Jordan<br>Stellvertreter:<br>PD Dr. Lutz Müller                                                       | Ethik-Kommissionen der Medizinischen<br>Fakultät<br>der Martin-Luther-Universität Halle-<br>Wittenberg<br>Magdeburger Str. 16<br>06112 Halle (Saale) |
| 15 | Asklepios Klinik Altona<br>Hämatologie, internistische<br>Onkologie und Palliativmedizin<br>Paul-Ehrlich-Straße 1<br>22763 Hamburg                                               | Prüfer:<br>Prof. Dr. Christian Meyer zum<br>Büschensfelde<br>Stellvertreter:<br>Dr. Murwan Ayoub                                 | Ethik-Kommission der Ärztekammer<br>Hamburg<br>Weidestraße 122 b<br>22083 Hamburg                                                                    |
| 16 | Universitätskrankenhaus<br>Hamburg-Eppendorf<br>Medizinische Klinik II<br>Onkologisches Zentrum<br>Martinistr. 52<br>20246 Hamburg                                               | Prüferin:<br>PD Dr. Mascha Binder<br>Stellvertreter:<br>Dr. Winfried Alsdorf                                                     | Ethik-Kommission der Ärztekammer<br>Hamburg<br>Weidestraße 122 b<br>22083 Hamburg                                                                    |
| 17 | Medizinische Hochschule<br>Hannover<br>Klinik für Hämatologie,<br>Hämostaseologie, Onkologie und<br>Stammzelltransplantation<br>Carl-Neuberg-Str. 1<br>30625 Hannover            | Prüferin:<br>Prof. Dr. Anke Franzke<br>Stellvertreter:<br>PD Dr. Christian Könecke<br>Stellvertreterin:<br>PD Dr. Felicitas Thol | Ethik-Kommission der Medizinischen<br>Hochschule Hannover<br>Carl-Neuberg-Straße 1<br>30625 Hannover                                                 |
| 18 | Universitätsklinikum des<br>Saarlandes Homburg<br>Innere Medizin I<br>Kirrberger Straße<br>66424 Homburg/ Saar                                                                   | Prüfer:<br>Prof. Dr. Michael Pfreundschuh<br>Stellvertreter:<br>Dr. Niels Murawski                                               | Ethik-Kommission bei der<br>Ärztekammer des Saarlandes<br>Faktoreistr. 4<br>66111 Saarbrücken                                                        |

**Participating centers und ethics committees**

|    |                                                                                                                                                                                         |                                                                                                                           |                                                                                                                                                  |
|----|-----------------------------------------------------------------------------------------------------------------------------------------------------------------------------------------|---------------------------------------------------------------------------------------------------------------------------|--------------------------------------------------------------------------------------------------------------------------------------------------|
| 19 | Medizinische Universitätsklinik Heidelberg<br>Abteilung Innere Medizin V<br>Im Neuenheimer Feld 410<br>69120 Heidelberg                                                                 | Prüferin:<br>Prof. Dr. Gerlinde Egerer<br>Stellvertreter:<br>PD Dr. Mathias Witzens-Harig                                 | Ethik-Kommission I<br>der Medizinischen Fakultät Heidelberg<br>Alte Glockengießerei 11/1<br>69115 Heidelberg                                     |
| 20 | Universitätsklinikum Jena<br>Klinik und Poliklinik für Innere<br>Medizin II<br>Hämatologie und internistische<br>Onkologie<br>Erlanger Allee 101<br>07747 Jena                          | Prüfer:<br>PD Dr. Thomas Ernst<br>Stellvertreter:<br>PD Dr. Sebastian Scholl                                              | Ethik-Kommission der Friedrich-Schiller-<br>Universität Jena an der Medizinischen<br>Fakultät<br>Bachstraße 18<br>07740 Jena                     |
| 21 | Universitätsklinikum Schleswig-<br>Holstein, Campus Kiel<br>Klinik für Innere Medizin II<br>Hämatologie und Internistische<br>Onkologie<br>Arnold-Heller-Str. 3 (Haus 50)<br>24105 Kiel | Prüfer:<br>Prof. Dr. Dr. Michael Kneba<br>Stellvertreterin:<br>PD Dr. Christiane Pott                                     | Ethik-Kommission der Medizinischen<br>Fakultät der Christian-Albrechts-<br>Universität zu Kiel<br>Arnold-Heller-Straße 3<br>Haus 9<br>24105 Kiel |
| 22 | Universitätsklinikum Schleswig-<br>Holstein<br>II. Medizinische Klinik und<br>Poliklinik<br>Chemnitzstr. 33<br>24116 Kiel                                                               | Prüfer:<br>Prof. Dr. Dr. Michael Kneba<br>Stellvertreterin:<br>Dr. Monika Lamprecht                                       | Ethik-Kommission der Medizinischen<br>Fakultät der Christian-Albrechts-<br>Universität zu Kiel<br>Arnold-Heller-Straße 3<br>Haus 9<br>24105 Kiel |
| 23 | Stiftungsklinikum Mittelrhein<br>GmbH<br>Zentrum für Innere Medizin<br>Johannes-Müller-Str. 7<br>56068 Koblenz                                                                          | Prüfer:<br>Prof. Dr. Ralph Naumann<br>Stellvertreter:<br>Dr. Dirk Niemann                                                 | Ethik-Kommission bei der<br>Landesärztekammer Rheinland-Pfalz<br>Deutschhausplatz 3<br>55116 Mainz                                               |
| 24 | Universitätsklinikum Köln<br>Innere Medizin 1<br>Kerpenerstr. 62<br>50937 Köln                                                                                                          | Prüfer:<br>Prof. Dr. Peter Borchmann<br>Stellvertreter:<br>Prof. Dr. Kai Hübel<br>Stellvertreterin:<br>Dr. Stefanie Sasse | Ethik-Kommission der Medizinischen<br>Fakultät der Universität zu Köln<br>Gebäude 5, Kerpener Str.62<br>50937 Köln                               |
| 25 | Universitätsklinikum Magdeburg<br>AöR<br>Klinik für Hämatologie und<br>Onkologie<br>Leipziger Str. 44<br>39120 Magdeburg                                                                | Prüfer:<br>Dr. Thomas Heinicke<br>Stellvertreter:<br>Dr. Enrico Schalk                                                    | Ethik-Kommission der Otto-von-<br>Guericke-Universität<br>an der Medizinischen Fakultät<br>Leipziger Straße 44<br>39120 Magdeburg                |
| 26 | Universitätsmedizin der Johannes<br>Gutenberg-Universität<br>III. Med. Klinik und Poliklinik<br>Langenbeckstr. 1<br>55101 Mainz                                                         | Prüfer:<br>PD Dr. Georg Heß<br>Stellvertreter:<br>Dr. Markus Munder                                                       | Ethik-Kommission bei der<br>Landesärztekammer Rheinland-Pfalz<br>Deutschhausplatz 3<br>55116 Mainz                                               |
| 27 | Klinikum der Universität München<br>Großhadern<br>Medizinische Klinik und Poliklinik<br>III<br>Hämatologie/Onkologie<br>Marchioninstr. 15<br>81377 München                              | Prüfer:<br>Prof. Dr. Martin Dreyling<br>Stellvertreterin:<br>Dr. Louisa von Baumgarten                                    | Ethik-Kommission der Medizinischen<br>Fakultät<br>der Ludwig-Maximilians Universität,<br>München<br>Pettenkofenstr. 8a<br>80336 München          |

**Participating centers und ethics committees**

|    |                                                                                                                                                                             |                                                                                       |                                                                                                                                                    |
|----|-----------------------------------------------------------------------------------------------------------------------------------------------------------------------------|---------------------------------------------------------------------------------------|----------------------------------------------------------------------------------------------------------------------------------------------------|
| 28 | Klinikum rechts der Isar<br>der TU München<br>III. Med. Klinik und Poliklinik<br>Hämatologie u. Internistische<br>Onkologie<br>Ismaninger Straße 22<br>81675 München        | Prüfer:<br>Prof. Dr. Ulrich Keller<br>Stellvertreter:<br>Dr. Alexander Esmaty         | Ethik-Kommission der Fakultät<br>für Medizin der Technischen Universität<br>München<br>Ismaninger Str. 22<br>81675 München                         |
| 29 | Ethik-Kommission der<br>Ärztammer Westfalen-Lippe<br>und der Westfälischen Wilhelms-<br>Universität Münster<br>Gartenstraße 210-214<br>48147 Münster                        | Prüfer:<br>Prof. Dr. Georg Lenz<br>Stellvertreterin:<br>Dr. Andrea Kerkhoff           | Ethik-Kommission der Ärztekammer<br>Westfalen-Lippe und der Westfälischen<br>Wilhelms-Universität Münster<br>Gartenstraße 210-214<br>48147 Münster |
| 30 | Pius-Hospital<br>Abteilung für Internistische<br>Onkologie<br>Georgstraße 12<br>26121 Oldenburg                                                                             | Prüfer:<br>Prof. Dr. Frank Griesinger<br>Stellvertreterin:<br>Dr. Imme Conradi        | Ethik-Kommission bei der<br>Ärztammer Niedersachsen<br>Berliner Allee 20<br>30175 Hannover                                                         |
| 31 | Klinikum Oldenburg gGmbH<br>Abt. Onkologie/Hämatologie<br>Rahel-Straus-Str. 10<br>26133 Oldenburg                                                                           | Prüfer:<br>Prof. Dr. Bernd Metzner<br>Stellvertreterin:<br>Dr. Ruth Thole             | Ethik-Kommission bei der<br>Ärztammer Niedersachsen<br>Berliner Allee 20<br>30175 Hannover                                                         |
| 32 | Universitätsklinikum Regensburg<br>Klinik & Poliklinik für Innere<br>Medizin III<br>Hämatologie & Onkologie<br>Franz-Josef-Strauss-Allee 11<br><b>93053 Regensburg</b>      | Prüfer:<br>Prof. Dr. Tobias Pukrop<br>Stellvertreter:<br>Dr. Joachim Hahn             | Ethik-Kommission an der Universität<br>Regensburg<br>Franz-Josef-Strauß Allee 11<br>93053 Regensburg                                               |
| 33 | Universitätsklinikum Tübingen<br>Medizinische Klinik II<br>Otfried-Müller-Str. 10<br>72076 Tübingen                                                                         | Prüfer:<br>Prof. Dr. Robert Möhle<br>Stellvertreter:<br>Dr. Martin Sökler             | Ethik-Kommission der Medizinischen<br>Fakultät und am Universitätsklinikum<br>Tübingen<br>Gartenstraße 47<br>72074 Tübingen                        |
| 34 | Universitätsklinikum Ulm<br>Klinik für Innere Medizin III<br>Hämatologie, Onkologie,<br>Rheumatologie und<br>Infektionskrankheiten<br>Albert-Einstein-Allee 23<br>89081 Ulm | Prüfer:<br>Prof. Dr. Stephan Stilgenbauer<br>Stellvertreterin:<br>Dr. Henriette Huber | Ethik-Kommission der Universität Ulm<br>Helmholtzstraße 20<br>89081 Ulm                                                                            |
| 35 | Schwarzwald-Baar Klinikum<br>Villingen-Schwenningen GmbH<br>Klinikstr. 11<br>78052 Villingen-Schwenningen                                                                   | Prüfer:<br>Prof. Dr. Wolfgang Brugger<br>Stellvertreterin:<br>Dr. Anja Rückert        | Ethik-Kommission bei der<br>Landesärztammer<br>Baden - Württemberg<br>Jahnstraße 40<br>70597 Stuttgart                                             |
